# Supplementary material for: Comparative Analysis of the Mitochondrial Genomes of Three Species of Yangiella (Hemiptera: Aradidae) and the Phylogenetic Implications of Aradidae
Source: MDPI journal article supplement (doi:10.3390/insects15070533), 2024-07-14
Supplement: s1 [file s1]

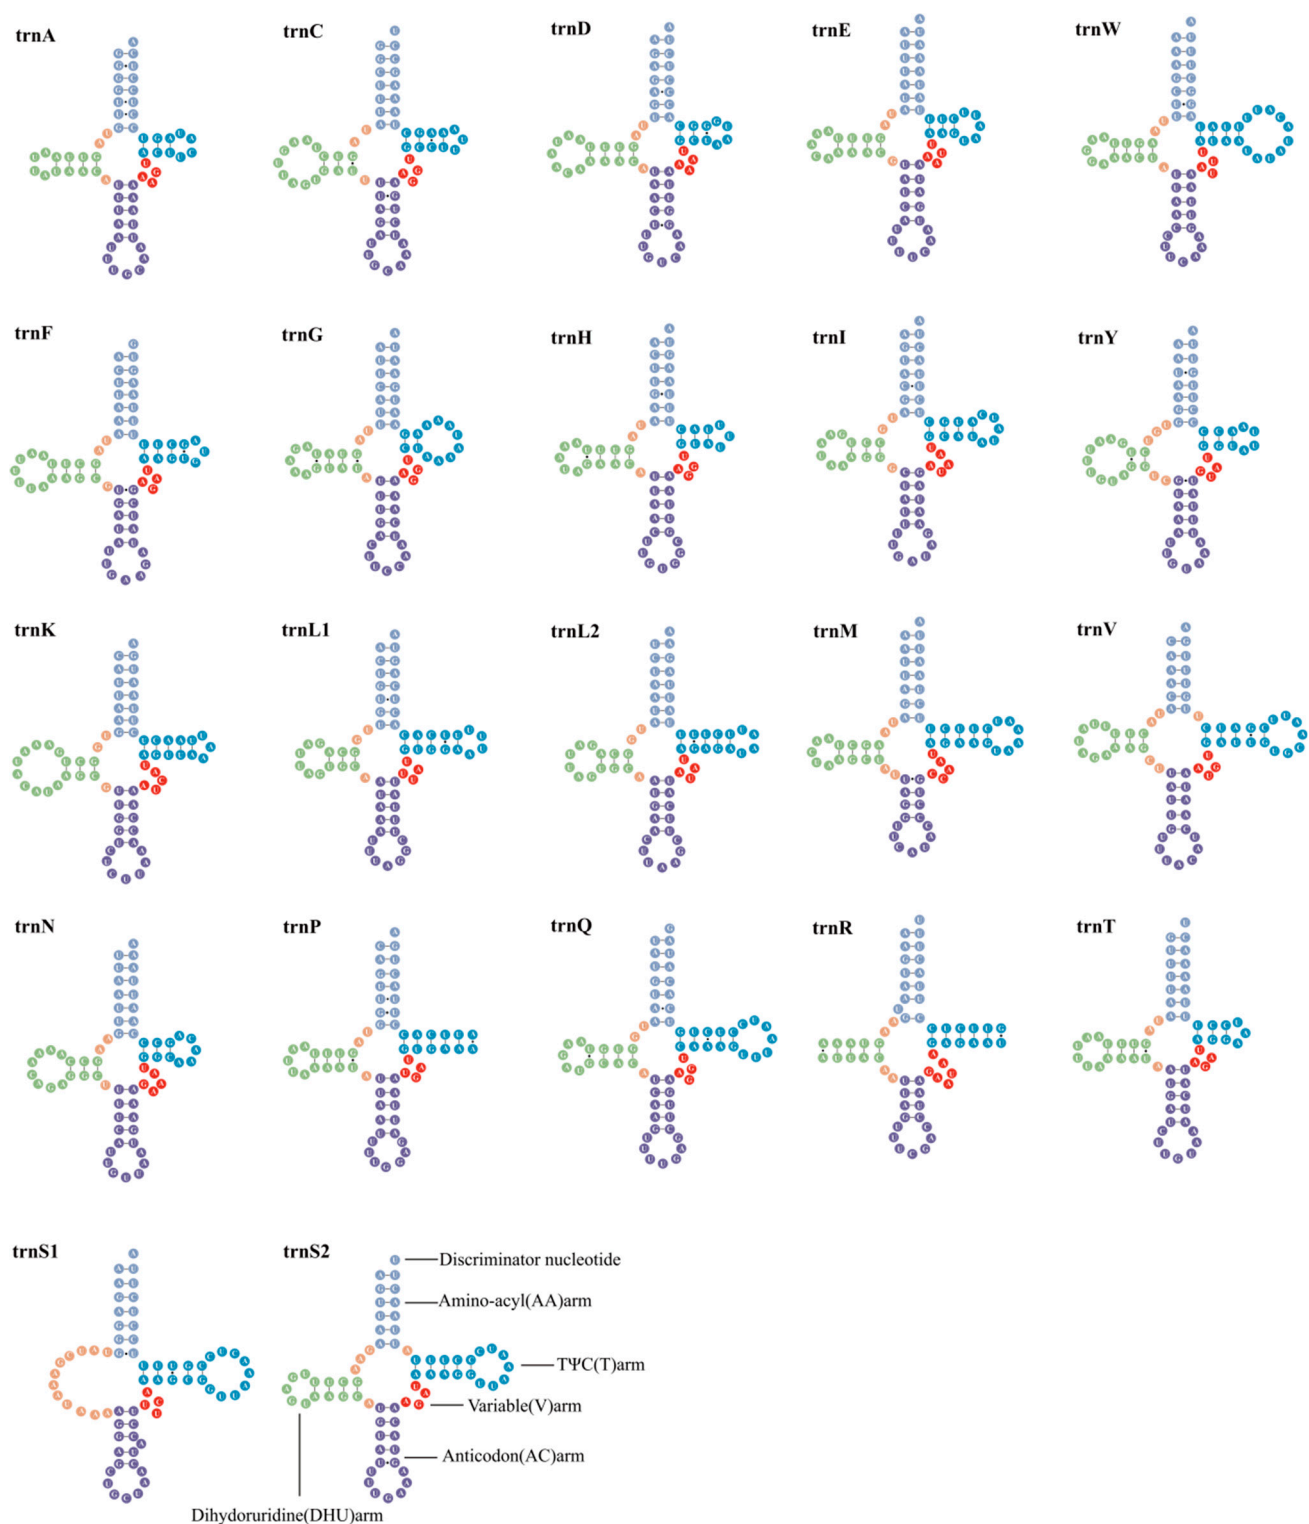

**Figure S1.** Secondary structure prediction of tRNA gene of *Yangiella mimetica*. The Watson-Crick pair is represented by a straight line, and the mismatch is represented by a dot. All of the *Y. mimetica* mitogenome tRNAs except for trnS1 follow the canonical conserved 3-loop cloverleaf structure consisting of the amino-acyl arm (lilac), dihydrouridine arm (DHU, green), the pseudouridine arm (TΨU loop, blue), and the anticodon loop (modena). All tRNAs also contain a variable region (red).

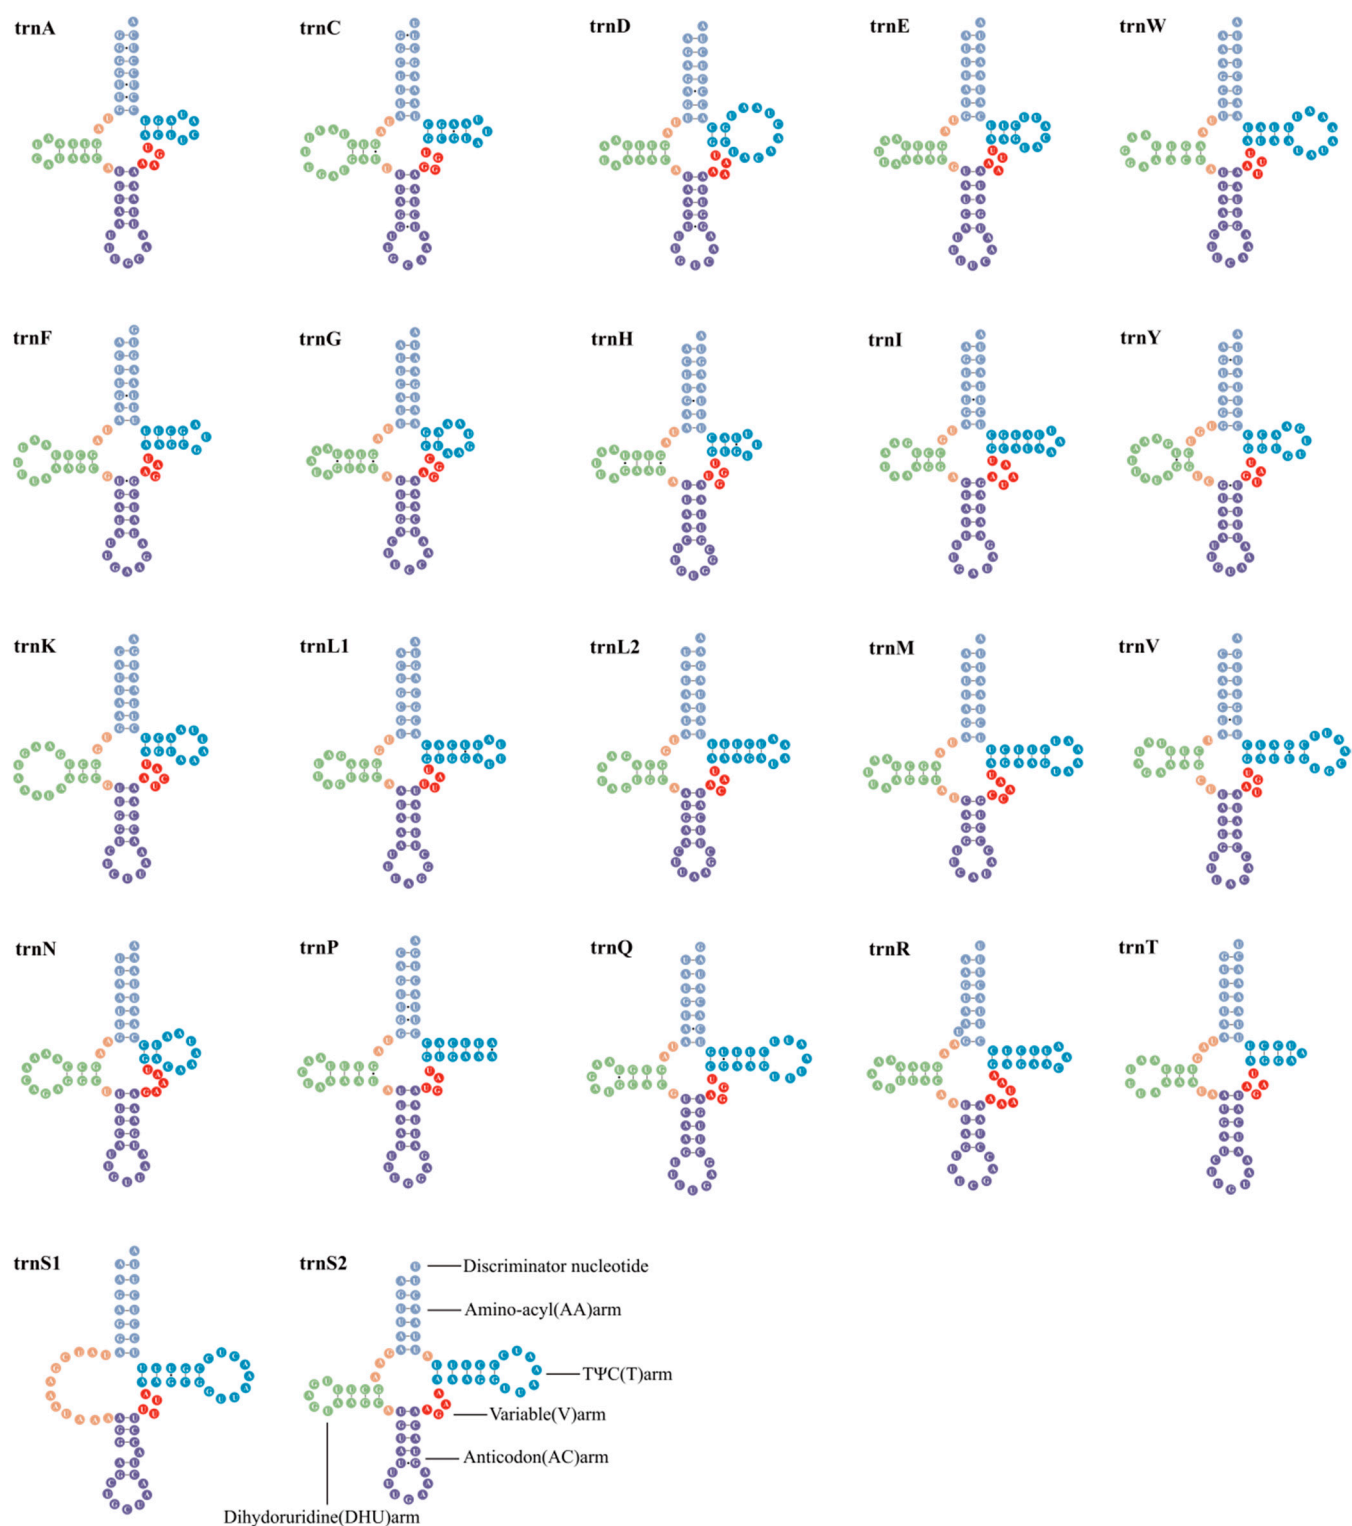

**Figure S2.** Secondary structure prediction of tRNA gene of *Yangiella montana*. The Watson-Crick pair is represented by a straight line, and the mismatch is represented by a dot. All of the *Y. montana* mitogenome tRNAs except for trnS1 follow the canonical conserved 3-loop cloverleaf structure consisting of the amino-acyl arm (lilac), dihydrouridine arm (DHU, green), the pseudouridine arm (TΨU loop, blue), and the anticodon loop (modena). All tRNAs also contain a variable region (red).

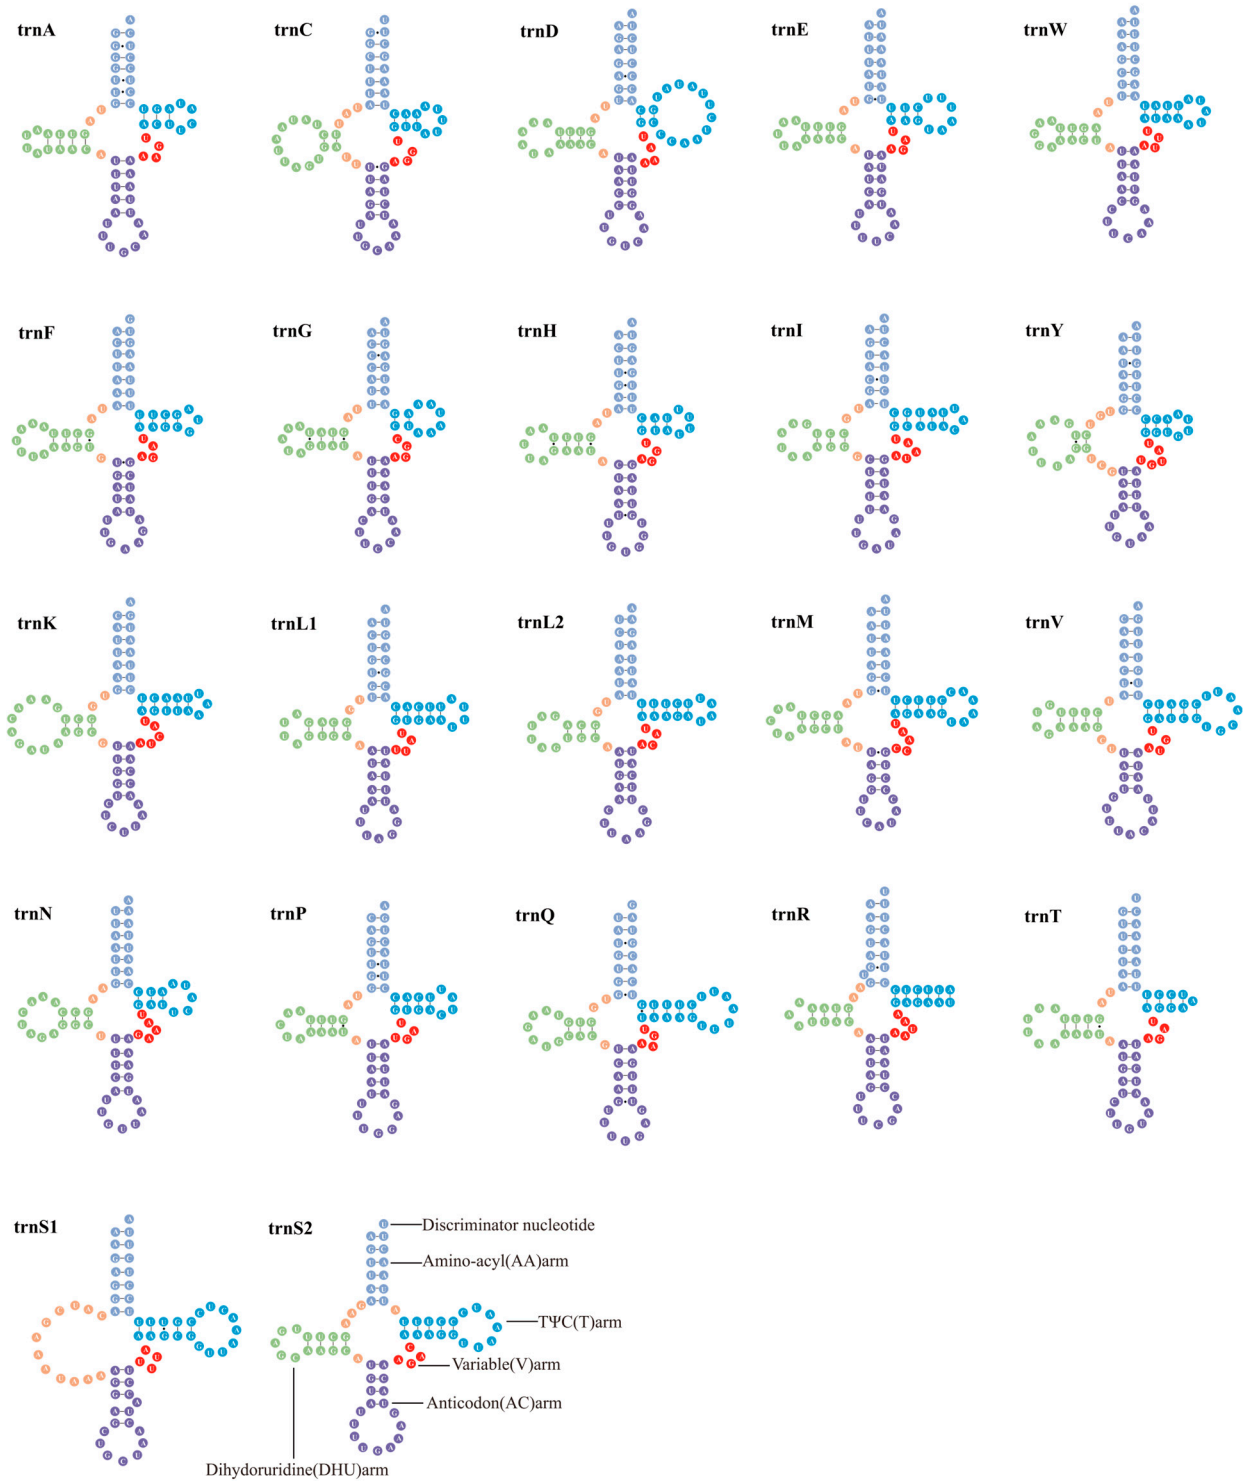

**Figure S3.** Secondary structure prediction of tRNA gene of *Yangiella* sp. The Watson-Crick pair is represented by a straight line, and the mismatch is represented by a dot. All of the *Yangiella* sp. mitogenome tRNAs except for *trnS1* follow the canonical conserved 3-loop cloverleaf structure consisting of the amino-acyl arm (lilac), dihydrouridine arm (DHU, green), the pseudouridine arm (TΨU loop, blue), and the anticodon loop (modena). All tRNAs also contain a variable region (red).

**Table S1.** Taxonomic information and GenBank accession numbers of mitogenomes used in this study. Sequences obtained in this study are marked with \*.

| Superfamily   | Family        | Subfamily   | Species                          | Length | NCBI No.  |
|---------------|---------------|-------------|----------------------------------|--------|-----------|
| Pentatomoidea | Cydnidae      | Cydninae    | <i>Macroscytus subaeneus</i>     | 15853  | NC 058970 |
|               | Urostylididae | Urostylinae | <i>Urochela quadrinotata</i>     | 16587  | NC 020144 |
|               |               | Calisiinae  | <i>Aradacanthia heissi</i>       | 15528  | HQ441233  |
|               |               | Aradinae    | <i>Aradus compar</i>             | 16814  | NC 030362 |
|               |               | Aneurinae   | <i>Aneurus similis</i>           | 16477  | NC 030360 |
|               |               | Aneurinae   | <i>Aneurus sublobatus</i>        | 16091  | NC 030361 |
|               |               | Carventinae | <i>Libiocoris heissi</i>         | 15168  | NC 030363 |
|               |               | Carventinae | <i>Taiwanaptera montana</i>      | 15615  | PP566609  |
| Aradoidea     | Aradidae      | Mezirinae   | <i>Arbanatus</i> sp.             | 15094  | MW619704  |
|               |               | Mezirinae   | <i>Brachyrhynchus hsiaoi</i>     | 15250  | NC 022670 |
|               |               | Mezirinae   | <i>Brachyrhynchus triangulus</i> | 15170  | NC 062724 |
|               |               | Mezirinae   | <i>Mezira</i> sp.                | 15283  | MW619718  |
|               |               | Mezirinae   | <i>Neuroctenus yunnanensis</i>   | 15389  | NC 063144 |
|               |               | Mezirinae   | <i>Yangiella</i> sp.*            | 15070  | PP708567  |
|               |               | Mezirinae   | <i>Yangiella mimetica</i> *      | 15192  | PP545373  |
|               |               | Mezirinae   | <i>Yangiella montana</i> *       | 15205  | PP708566  |

\*Due to the skepticism about the correctness of some species identification of Aradidae, all Aradidae data from the GenBank database were not used. These species will be re-sequenced in subsequent studies.

**Table S2.** Optimal partitioning strategy and evolution model of PCGs12RNA BI

| Subset | Number of sites | Name                                                                     | Best Model |
|--------|-----------------|--------------------------------------------------------------------------|------------|
| 1      | 1225            | atp6 codonA+atp8 codonB+nad2 codonA+nad3 codonA+nad4L codonA+nad4 codonA | GTR+F+I+G4 |
| 2      | 1889            | atp6 codonB+cox1 codonB+cox2 codonB+cox3 codonB+cytb codonB+nad1 codonB  | GTR+F+I+G4 |
| 3      | 741             | atp8 codonA+nad5 codonA+nad6 codonA                                      | GTR+F+I+G4 |
| 4      | 1363            | cox1 codonA+cox2 codonA+cox3 codonA+cytb codonA                          | GTR+F+I+G4 |
| 5      | 2249            | nad1 codonA+rrnS +rrnL                                                   | GTR+F+I+G4 |
| 6      | 456             | nad2 codonB+nad6 codonB                                                  | GTR+F+G4   |
| 7      | 1198            | nad3 codonB+nad4L codonB+nad4 codonB+nad5 codonB                         | GTR+F+I+G4 |

**Table S3.** Optimal partitioning strategy and evolution model of PCGs12RNA IQ

| Subset | Number of sites | Name                                                                     | Best Model   |
|--------|-----------------|--------------------------------------------------------------------------|--------------|
| 1      | 1225            | atp6 codonA+atp8 codonB+nad2 codonA+nad3 codonA+nad4L codonA+nad4 codonA | GTR+F+I+G4   |
| 2      | 1889            | atp6 codonB+cox1 codonB+cox2 codonB+cox3 codonB+cytb codonB+nad1 codonB  | TVM+F+I+I+R3 |
| 3      | 741             | atp8 codonA+nad5 codonA+nad6 codonA                                      | GTR+F+R3     |
| 4      | 1363            | cox1 codonA+cox2 codonA+cox3 codonA+cytb codonA                          | GTR+F+R3     |
| 5      | 2249            | nad1 codonA+rrnS +rrnL                                                   | GTR+F+I+G4   |
| 6      | 456             | nad2 codonB+nad6 codonB                                                  | TVM+F+I+G4   |
| 7      | 1198            | nad3 codonB+nad4L codonB+nad4 codonB+nad5 codonB                         | GTR+F+I+G4   |

**Table S4.** Optimal partitioning strategy and evolution model of PCGsRNA BI

| Subset | Number of sites | Name                                                                    | Best Model |
|--------|-----------------|-------------------------------------------------------------------------|------------|
| 1      | 697             | atp6 codon1+atp8 codon1+nad2 codon1+nad3 codon1                         | GTR+F+I+G4 |
| 2      | 1701            | atp6 codon2+cox1 codon2+cox2 codon2+cox3 codon2+cytb codon2+nad3 codon2 | GTR+F+I+G4 |
| 3      | 479             | atp6 codon3+cox3 codon3                                                 | HKY+F+I+G4 |
| 4      | 501             | atp8 codon2+nad2 codon2+nad6 codon2                                     | GTR+F+I+G4 |
| 5      | 501             | atp8 codon3+nad2 codon3+nad6 codon3                                     | HKY+F+G4   |
| 6      | 1363            | cox1 codon1+cox2 codon1+cox3 codon1+cytb codon1                         | GTR+F+I+G4 |
| 7      | 1222            | cox1 codon3+cox2 codon3+cytb codon3+nad3 codon3                         | HKY+F+I+G4 |
| 8      | 2249            | nad1 codon1+rrnS +rrnL                                                  | GTR+F+I+G4 |
| 9      | 1386            | nad1 codon2+nad4L codon2+nad4 codon2+nad5 codon2                        | GTR+F+I+G4 |
| 10     | 945             | nad1 codon3+nad4L codon3+nad5 codon3                                    | HKY+F+G4   |
| 11     | 1224            | nad4L codon1+nad4 codon1+nad5 codon1+nad6 codon1                        | GTR+F+I+G4 |
| 12     | 441             | nad4 codon3                                                             | GTR+F+I+G4 |

**Table S5.** Optimal partitioning strategy and evolution model of PCGsRNA IQ

| Subset | Number of sites | Name                                                                    | Best Model     |
|--------|-----------------|-------------------------------------------------------------------------|----------------|
| 1      | 697             | atp6 codon1+atp8 codon1+nad2 codon1+nad3 codon1                         | GTR+F+I+G4     |
| 2      | 1701            | atp6 codon2+cox1 codon2+cox2 codon2+cox3 codon2+cytb codon2+nad3 codon2 | GTR+F+I+G4     |
| 3      | 479             | atp6 codon3+cox3 codon3                                                 | TPM3u+F+I+I+R3 |
| 4      | 501             | atp8 codon2+nad2 codon2+nad6 codon2                                     | TVM+F+I+G4     |
| 5      | 501             | atp8 codon3+nad2 codon3+nad6 codon3                                     | HKY+F+G4       |
| 6      | 1363            | cox1 codon1+cox2 codon1+cox3 codon1+cytb codon1                         | GTR+F+R3       |
| 7      | 1222            | cox1 codon3+cox2 codon3+cytb codon3+nad3 codon3                         | TPM3u+F+I+I+R3 |
| 8      | 2249            | nad1 codon1+rrnS +rrnL                                                  | GTR+F+I+G4     |
| 9      | 1386            | nad1 codon2+nad4L codon2+nad4 codon2+nad5 codon2                        | GTR+F+I+G4     |
| 10     | 945             | nad1 codon3+nad4L codon3+nad5 codon3                                    | HKY+F+R3       |
| 11     | 1224            | nad4L codon1+nad4 codon1+nad5 codon1+nad6 codon1                        | GTR+F+I+G4     |
| 12     | 441             | nad4 codon3                                                             | TIM2+F+I+G4    |

**Table S6.** Calibration points and references

| Species                    | Node assigned                                         | Minimum age (MYA) | Maximum age (MYA) | References |
|----------------------------|-------------------------------------------------------|-------------------|-------------------|------------|
| <i>Kerjiecoris oopsis</i>  | Pentatomomorpha                                       | 202               | 228               | 1          |
| <i>Aradacanthia heissi</i> | Aradidae                                              | 140               | 181               | 2          |
| <i>Aradus compar</i>       | Aradinae , Aneurinae,<br>Carventinae and<br>Mezirinae | 113               | 155               | 2          |

**Table S7.** Gene order and basic characteristics of the *Yangiella mimetica* mt genome

| Gene           | Type   | start | stop  | Gene length(bp) | Strand | Initiation codon | Stop codon | Intergenic nucleotide |
|----------------|--------|-------|-------|-----------------|--------|------------------|------------|-----------------------|
| trnQ(ttg)      | tRNA   | 1     | 69    | 69              | N      |                  |            | 44                    |
| trnI(gat)      | tRNA   | 114   | 178   | 65              | J      |                  |            | -1                    |
| trnM(cat)      | tRNA   | 178   | 245   | 68              | J      |                  |            | 0                     |
| nad2           | CDS    | 246   | 1223  | 978             | J      | ATA              | TAA        | -2                    |
| trnW(tca)      | tRNA   | 1222  | 1291  | 70              | J      |                  |            | -8                    |
| trnC(gca)      | tRNA   | 1284  | 1348  | 65              | N      |                  |            | 2                     |
| trnY(gta)      | tRNA   | 1351  | 1414  | 64              | N      |                  |            | -1                    |
| cox1           | CDS    | 1414  | 2949  | 1536            | J      | TTG              | TAA        | 0                     |
| trnL2(taa)     | tRNA   | 2950  | 3014  | 65              | J      |                  |            | 0                     |
| cox2           | CDS    | 3015  | 3687  | 673             | J      | TTG              | T          | 0                     |
| trnK(ctt)      | tRNA   | 3688  | 3756  | 69              | J      |                  |            | -1                    |
| trnD(gtc)      | tRNA   | 3756  | 3819  | 64              | J      |                  |            | 0                     |
| atp8           | CDS    | 3820  | 3975  | 156             | J      | ATA              | TAA        | -7                    |
| atp6           | CDS    | 3969  | 4637  | 669             | J      | ATG              | TAA        | -1                    |
| cox3           | CDS    | 4637  | 5419  | 783             | J      | ATG              | TAA        | 2                     |
| trnG(tcc)      | tRNA   | 5422  | 5485  | 64              | J      |                  |            | 0                     |
| nad3           | CDS    | 5486  | 5836  | 351             | J      | ATT              | TAG        | 0                     |
| trnA(tgc)      | tRNA   | 5837  | 5897  | 61              | J      |                  |            | 1                     |
| trnR(tcg)      | tRNA   | 5899  | 5961  | 63              | J      |                  |            | -1                    |
| trnN(gtt)      | tRNA   | 5961  | 6025  | 65              | J      |                  |            | -1                    |
| trnS1(gct)     | tRNA   | 6025  | 6092  | 68              | J      |                  |            | -1                    |
| trnE(ttc)      | tRNA   | 6092  | 6154  | 63              | J      |                  |            | 0                     |
| trnF(gaa)      | tRNA   | 6155  | 6219  | 65              | N      |                  |            | 0                     |
| nad5           | CDS    | 6220  | 7909  | 1690            | N      | ATT              | T          | 0                     |
| trnH(gtg)      | tRNA   | 7910  | 7970  | 61              | N      |                  |            | 0                     |
| nad4           | CDS    | 7971  | 9285  | 1315            | N      | ATA              | T          | -4                    |
| nad4l          | CDS    | 9282  | 9554  | 273             | N      | ATA              | TAA        | 2                     |
| trnT(tgt)      | tRNA   | 9557  | 9618  | 62              | J      |                  |            | 0                     |
| trnP(tgg)      | tRNA   | 9619  | 9682  | 64              | N      |                  |            | 2                     |
| nad6           | CDS    | 9685  | 10137 | 453             | J      | ATA              | TAA        | -1                    |
| cob            | CDS    | 10137 | 11267 | 1131            | J      | ATG              | TAA        | 2                     |
| trnS2(tga)     | tRNA   | 11270 | 11338 | 69              | J      |                  |            | 18                    |
| nad1           | CDS    | 11357 | 12274 | 918             | N      | TTG              | TAA        | 0                     |
| trnL1(tag)     | tRNA   | 12275 | 12339 | 65              | N      |                  |            | 0                     |
| rrnL           | rRNA   | 12340 | 13723 | 1384            | N      |                  |            | 0                     |
| trnV(tac)      | tRNA   | 13724 | 13792 | 69              | N      |                  |            | 0                     |
| rrnS           | rRNA   | 13793 | 14538 | 746             | N      |                  |            | 0                     |
| control region | D-loop | 14539 | 15192 | 654             | J      |                  |            | 0                     |



**Table S8.** Gene order and basic characteristics of the *Yangiella mimetica* mt genome

| Gene           | Type   | start | stop  | Gene length(bp) | Strand | Initiation codon | Stop codon | Intergenic nucleotide |
|----------------|--------|-------|-------|-----------------|--------|------------------|------------|-----------------------|
| trnQ(ttg)      | tRNA   | 1     | 69    | 69              | N      |                  |            | 45                    |
| trnI(gat)      | tRNA   | 115   | 179   | 65              | J      |                  |            | -1                    |
| trnM(cat)      | tRNA   | 179   | 246   | 68              | J      |                  |            | 0                     |
| nad2           | CDS    | 247   | 1224  | 978             | J      | ATA              | TAA        | -2                    |
| trnW(tca)      | tRNA   | 1223  | 1290  | 68              | J      |                  |            | -8                    |
| trnC(gca)      | tRNA   | 1283  | 1347  | 65              | N      |                  |            | 2                     |
| trnY(gta)      | tRNA   | 1350  | 1414  | 65              | N      |                  |            | -1                    |
| cox1           | CDS    | 1414  | 2949  | 1536            | J      | TTG              | TAA        | 0                     |
| trnL2(taa)     | tRNA   | 2950  | 3014  | 65              | J      |                  |            | 0                     |
| cox2           | CDS    | 3015  | 3687  | 673             | J      | TTG              | T          | 0                     |
| trnK(ctt)      | tRNA   | 3688  | 3755  | 68              | J      |                  |            | -1                    |
| trnD(gtc)      | tRNA   | 3755  | 3819  | 65              | J      |                  |            | 0                     |
| atp8           | CDS    | 3820  | 3975  | 156             | J      | ATA              | TAA        | -7                    |
| atp6           | CDS    | 3969  | 4637  | 669             | J      | ATG              | TAA        | -1                    |
| cox3           | CDS    | 4637  | 5419  | 783             | J      | ATG              | TAA        | 2                     |
| trnG(tcc)      | tRNA   | 5422  | 5483  | 62              | J      |                  |            | 0                     |
| nad3           | CDS    | 5484  | 5834  | 351             | J      | ATA              | TAG        | 1                     |
| trnA(tgc)      | tRNA   | 5836  | 5896  | 61              | J      |                  |            | 1                     |
| trnR(tcg)      | tRNA   | 5898  | 5964  | 67              | J      |                  |            | -1                    |
| trnN(gtt)      | tRNA   | 5964  | 6028  | 65              | J      |                  |            | -1                    |
| trnS1(gct)     | tRNA   | 6028  | 6095  | 68              | J      |                  |            | -1                    |
| trnE(ttc)      | tRNA   | 6095  | 6158  | 64              | J      |                  |            | 0                     |
| trnF(gaa)      | tRNA   | 6159  | 6223  | 65              | N      |                  |            | 0                     |
| nad5           | CDS    | 6224  | 7913  | 1690            | N      | ATT              | T          | 0                     |
| trnH(gtg)      | tRNA   | 7914  | 7974  | 61              | N      |                  |            | 0                     |
| nad4           | CDS    | 7975  | 9292  | 1318            | N      | ATG              | T          | -7                    |
| nad4l          | CDS    | 9286  | 9558  | 273             | N      | ATA              | TAA        | 2                     |
| trnT(tgt)      | tRNA   | 9561  | 9622  | 62              | J      |                  |            | 0                     |
| trnP(tgg)      | tRNA   | 9623  | 9686  | 64              | N      |                  |            | 2                     |
| nad6           | CDS    | 9689  | 10141 | 453             | J      | ATA              | TAA        | -1                    |
| cob            | CDS    | 10141 | 11274 | 1134            | J      | ATG              | TAA        | -1                    |
| trnS2(tga)     | tRNA   | 11274 | 11342 | 69              | J      |                  |            | 18                    |
| nad1           | CDS    | 11361 | 12278 | 918             | N      | TTG              | TAA        | 0                     |
| trnL1(tag)     | tRNA   | 12279 | 12343 | 65              | N      |                  |            | 0                     |
| rrnL           | rRNA   | 12344 | 13602 | 1259            | N      |                  |            | 0                     |
| trnV(tac)      | tRNA   | 13603 | 13670 | 68              | N      |                  |            | 0                     |
| rrnS           | rRNA   | 13671 | 14418 | 748             | N      |                  |            | 0                     |
| control region | D-loop | 14419 | 15205 | 787             | J      |                  |            | 0                     |

**Table S9.** Gene order and basic characteristics of the *Yangiella* sp mt genome

| Gene           | Type   | start | stop  | Gene length(bp) | Strand | Initiation codon | Stop codon | Intergenic nucleotide |
|----------------|--------|-------|-------|-----------------|--------|------------------|------------|-----------------------|
| trnQ(ttg)      | tRNA   | 1     | 69    | 69              | N      |                  |            | 50                    |
| trnI(gat)      | tRNA   | 120   | 184   | 65              | J      |                  |            | -1                    |
| trnM(cat)      | tRNA   | 184   | 251   | 68              | J      |                  |            | 0                     |
| nad2           | CDS    | 252   | 1229  | 978             | J      | ATA              | TAA        | -2                    |
| trnW(tca)      | tRNA   | 1228  | 1292  | 65              | J      |                  |            | -8                    |
| trnC(gca)      | tRNA   | 1285  | 1350  | 66              | N      |                  |            | 1                     |
| trnY(gta)      | tRNA   | 1352  | 1414  | 63              | N      |                  |            | -1                    |
| cox1           | CDS    | 1414  | 2949  | 1536            | J      | TTG              | TAA        | 0                     |
| trnL2(taa)     | tRNA   | 2950  | 3014  | 65              | J      |                  |            | 0                     |
| cox2           | CDS    | 3015  | 3687  | 673             | J      | TTG              | T          | 0                     |
| trnK(ctt)      | tRNA   | 3688  | 3756  | 69              | J      |                  |            | -1                    |
| trnD(gtc)      | tRNA   | 3756  | 3824  | 69              | J      |                  |            | 0                     |
| atp8           | CDS    | 3825  | 3980  | 156             | J      | ATA              | TAA        | -7                    |
| atp6           | CDS    | 3974  | 4642  | 669             | J      | ATG              | TAA        | -1                    |
| cox3           | CDS    | 4642  | 5424  | 783             | J      | ATG              | TAA        | 2                     |
| trnG(tcc)      | tRNA   | 5427  | 5488  | 62              | J      |                  |            | 0                     |
| nad3           | CDS    | 5489  | 5842  | 354             | J      | ATT              | TAG        | -1                    |
| trnA(tgc)      | tRNA   | 5842  | 5902  | 61              | J      |                  |            | 1                     |
| trnR(tcg)      | tRNA   | 5904  | 5967  | 64              | J      |                  |            | -1                    |
| trnN(gtt)      | tRNA   | 5967  | 6031  | 65              | J      |                  |            | -1                    |
| trnS1(gct)     | tRNA   | 6031  | 6098  | 68              | J      |                  |            | -1                    |
| trnE(ttc)      | tRNA   | 6098  | 6161  | 64              | J      |                  |            | 0                     |
| trnF(gaa)      | tRNA   | 6162  | 6226  | 65              | N      |                  |            | 0                     |
| nad5           | CDS    | 6227  | 7916  | 1690            | N      | ATT              | T          | 0                     |
| trnH(gtg)      | tRNA   | 7917  | 7978  | 62              | N      |                  |            | 0                     |
| nad4           | CDS    | 7979  | 9296  | 1318            | N      | ATG              | T          | -7                    |
| nad4l          | CDS    | 9290  | 9562  | 273             | N      | ATT              | TAA        | 2                     |
| trnT(tgt)      | tRNA   | 9565  | 9626  | 62              | J      |                  |            | 0                     |
| trnP(tgg)      | tRNA   | 9627  | 9690  | 64              | N      |                  |            | 2                     |
| nad6           | CDS    | 9693  | 10145 | 453             | J      | ATG              | TAA        | -1                    |
| cob            | CDS    | 10145 | 11278 | 1134            | J      | ATG              | TAG        | -2                    |
| trnS2(tga)     | tRNA   | 11277 | 11345 | 69              | J      |                  |            | 18                    |
| nad1           | CDS    | 11364 | 12281 | 918             | N      | TTG              | TAA        | 0                     |
| trnL1(tag)     | tRNA   | 12282 | 12346 | 65              | N      |                  |            | 0                     |
| rrnL           | rRNA   | 12347 | 13604 | 1258            | N      |                  |            | 0                     |
| trnV(tac)      | tRNA   | 13605 | 13672 | 68              | N      |                  |            | 0                     |
| rrnS           | rRNA   | 13673 | 14415 | 743             | N      |                  |            | 0                     |
| control region | D-loop | 14416 | 15070 | 655             | J      |                  |            | 0                     |

**Table S10.** Base composition of *Y. mimetica*, *Y. montana* and *Yangiella* sp. Mitogenomes

| Regions              | Size (bp) | Nucleotides Composition(%) |      |      |      |      |      | AT skew | GC skew |
|----------------------|-----------|----------------------------|------|------|------|------|------|---------|---------|
|                      |           | T                          | C    | A    | G    | AT   | GC   |         |         |
| Full genome          |           |                            |      |      |      |      |      |         |         |
| <i>Y. mimetica</i>   | 15192     | 29.7                       | 17.4 | 39.7 | 13.2 | 69.4 | 30.6 | 0.143   | -0.136  |
| <i>Y. montana</i>    | 15205     | 28.5                       | 18.1 | 40.6 | 12.8 | 69.1 | 30.9 | 0.175   | -0.173  |
| <i>Yangiella</i> sp. | 15070     | 28.6                       | 18.1 | 41.1 | 12.2 | 69.7 | 30.3 | 0.179   | -0.195  |
| PCGs-all             |           |                            |      |      |      |      |      |         |         |
| <i>Y. mimetica</i>   | 10923     | 38.4                       | 15.9 | 30.6 | 15.1 | 69.0 | 31.0 | -0.113  | -0.025  |
| <i>Y. montana</i>    | 10929     | 37.8                       | 16.1 | 30.6 | 15.4 | 68.4 | 31.5 | -0.105  | -0.023  |
| <i>Yangiella</i> sp. | 10932     | 38.1                       | 15.7 | 31.0 | 15.1 | 69.1 | 30.8 | -0.102  | -0.019  |
| PCGs-J               |           |                            |      |      |      |      |      |         |         |
| <i>Y. mimetica</i>   | 6729      | 32.9                       | 18.0 | 35.1 | 14.0 | 68.0 | 32.0 | 0.033   | -0.122  |
| <i>Y. montana</i>    | 6732      | 31.6                       | 18.5 | 36.4 | 13.5 | 68.0 | 32.0 | 0.071   | -0.158  |
| <i>Yangiella</i> sp. | 6735      | 31.3                       | 18.7 | 36.7 | 13.3 | 68.0 | 32.0 | 0.079   | -0.170  |
| PCGs-N               |           |                            |      |      |      |      |      |         |         |
| <i>Y. mimetica</i>   | 4194      | 47.3                       | 12.5 | 23.4 | 16.8 | 70.7 | 29.3 | -0.338  | 0.146   |
| <i>Y. montana</i>    | 4197      | 47.8                       | 12.3 | 21.3 | 18.5 | 69.1 | 30.8 | -0.383  | 0.202   |
| <i>Yangiella</i> sp. | 4197      | 49.0                       | 10.9 | 22.0 | 18.1 | 71.0 | 29.0 | -0.381  | 0.247   |
| 1st codon position   |           |                            |      |      |      |      |      |         |         |
| <i>Y. mimetica</i>   | 3641      | 31.4                       | 13.8 | 34.5 | 20.3 | 65.9 | 34.1 | 0.048   | 0.188   |
| <i>Y. montana</i>    | 3643      | 30.8                       | 14.1 | 34.1 | 21.0 | 64.9 | 35.1 | 0.051   | 0.197   |
| <i>Yangiella</i> sp. | 3644      | 31.3                       | 13.5 | 34.7 | 20.5 | 66.0 | 34.0 | 0.050   | 0.206   |
| 2nd codon position   |           |                            |      |      |      |      |      |         |         |
| <i>Y. mimetica</i>   | 3641      | 46.0                       | 19.9 | 18.9 | 15.2 | 64.9 | 35.1 | -0.418  | -0.135  |
| <i>Y. montana</i>    | 3643      | 45.7                       | 20.0 | 19.1 | 15.1 | 64.8 | 35.1 | -0.410  | -0.141  |
| <i>Yangiella</i> sp. | 3644      | 45.9                       | 19.9 | 19.2 | 15.0 | 65.1 | 34.9 | -0.411  | -0.140  |
| 3rd codon position   |           |                            |      |      |      |      |      |         |         |
| <i>Y. mimetica</i>   | 3641      | 37.8                       | 13.8 | 38.5 | 9.9  | 76.3 | 23.7 | 0.009   | -0.168  |
| <i>Y. montana</i>    | 3643      | 36.9                       | 14.3 | 38.6 | 10.1 | 75.5 | 24.4 | 0.023   | -0.170  |
| <i>Yangiella</i> sp. | 3644      | 37.1                       | 13.7 | 39.3 | 9.9  | 76.4 | 23.6 | 0.028   | -0.164  |
| control region       |           |                            |      |      |      |      |      |         |         |
| <i>Y. mimetica</i>   | 654       | 33.5                       | 17.9 | 31.8 | 16.8 | 65.3 | 34.7 | -0.026  | -0.031  |
| <i>Y. montana</i>    | 787       | 32.7                       | 16.3 | 35.2 | 15.9 | 67.9 | 32.2 | 0.037   | -0.012  |
| <i>Yangiella</i> sp. | 655       | 31.6                       | 16.5 | 36.0 | 15.9 | 67.6 | 32.4 | 0.065   | -0.019  |
| rRNAs                |           |                            |      |      |      |      |      |         |         |
| <i>Y. mimetica</i>   | 2130      | 42.3                       | 11.0 | 28.9 | 17.9 | 71.2 | 28.9 | -0.188  | 0.239   |
| <i>Y. montana</i>    | 2007      | 42.8                       | 10.3 | 28.7 | 18.2 | 71.5 | 28.5 | -0.196  | 0.276   |
| <i>Yangiella</i> sp. | 2001      | 42.2                       | 10.2 | 29.5 | 18.1 | 71.7 | 28.3 | -0.177  | 0.277   |
| tRNAs                |           |                            |      |      |      |      |      |         |         |
| <i>Y. mimetica</i>   | 1438      | 35.3                       | 12.3 | 36.4 | 16.1 | 71.7 | 28.4 | 0.016   | 0.132   |
| <i>Y. montana</i>    | 1439      | 35.2                       | 12.1 | 36.8 | 15.9 | 72.0 | 28.0 | 0.021   | 0.136   |
| <i>Yangiella</i> sp. | 1438      | 35.9                       | 12.2 | 36.0 | 15.9 | 71.9 | 28.1 | 0.002   | 0.134   |

**Table S11.** Divergence time, 95% confidence interval in parentheses

| Taxa clade                                                        | PCGRNA (MYA)   | PCG12RNA (MYA) |
|-------------------------------------------------------------------|----------------|----------------|
| Aradoidea                                                         | 168 (149, 187) | 168 (149, 187) |
| (Aradinae, (Mezirinae, (Carventinae, Aneurinae)))                 | 146 (130, 162) | 146 (130, 162) |
| (Mezirinae, (Carventinae, Aneurinae))                             | 128 (114, 143) | 126 (110, 141) |
| (Arbanatus, (Brachyrhynchus, (Mezira, (Neuroctenus, Yangiella)))) | 99 (85, 114)   | 92 (78, 107)   |
| (Brachyrhynchus, (Mezira, (Neuroctenus, Yangiella)))              | 92 (78, 106)   | 85 (69, 99)    |
| (Mezira, (Neuroctenus, Yangiella))                                | 82 (68, 96)    | 75 (60, 89)    |
| (Neuroctenus, Yangiella)                                          | 57 (44, 69)    | 45 (34, 58)    |

1. Lin, Q.B. Late Triassic insect fauna from Toksun, Xinjiang. *Acta Pal. Sin.* **1992**, 31, 313–335.
2. Song, F.; Li, H.; Shao, R.; Shi, A.; Bai, X.; Zheng, X.; Heiss, E.; Cai, W. Rearrangement of mitochondrial tRNA genes in flat bugs (Hemiptera: Aradidae). *Sci. Rep.* **2016**, 6, 25725.
